# Supplementary material for: Roasting pretreatment of walnut (Juglans regiaL.) kernels: improvement of the oil flavor profile and correlation with the chemical composition
Source: Royal Society of Chemistry journal article supplement (doi:10.1039/d2fo01990f), 2022-01-01

**Fig. S1** Heatmap illustrating the distribution of free amino acids and reducing sugars in walnut oilcakes prepared from untreated and roasted kernels treated for 10, 20, and 30 min.

**Fig. S1**

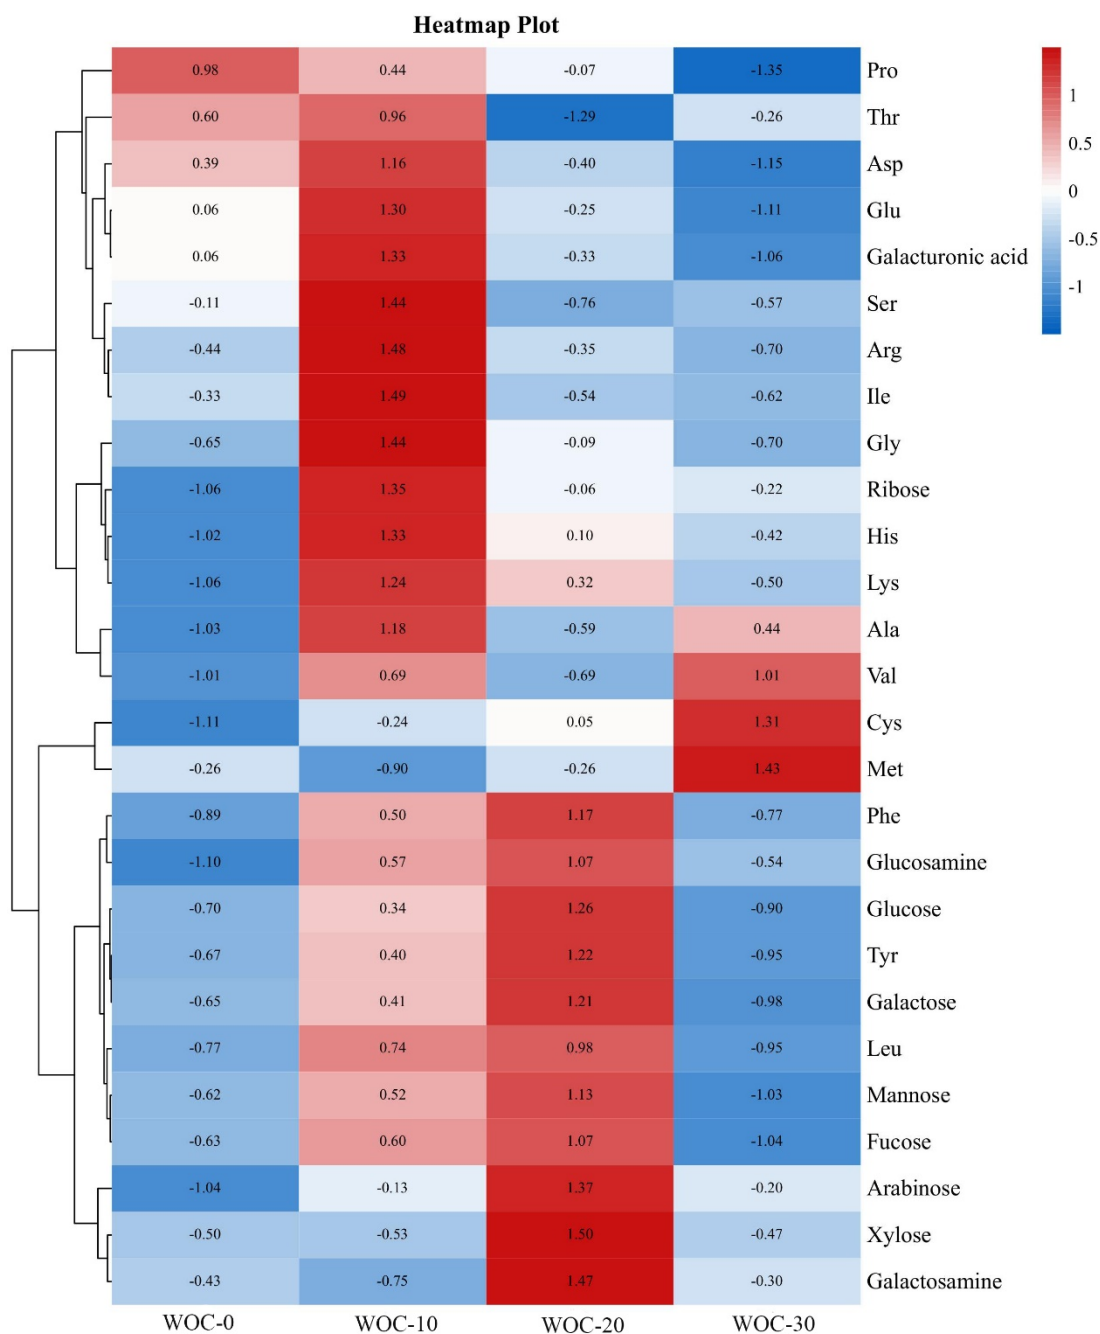

Supplement: d2fo01990f1.pdf [file d2fo01990f1.pdf]
